# Supplementary material for: Highly Efficient Antibacterial Polymer Composites Based on Hydrophobic Riboflavin Carbon Polymerized Dots
Source: MDPI journal article supplement (doi:10.3390/nano12224070), 2022-11-18
Supplement: s1 [file s1]

# Highly Efficient Antibacterial Polymer Composites Based on Hydrophobic Riboflavin Carbon Polymerized Dots

Zoran M. Marković <sup>1,\*</sup>, Mária Kováčová <sup>2,3</sup>, Sanja R. Jeremić <sup>4</sup>, Štefan Nagy <sup>5</sup>, Dušan D. Milivojević <sup>1</sup>, Pavel Kubat <sup>6</sup>, Angela Kleinová <sup>2</sup>, Milica D. Budimir <sup>1</sup>, Marija M. Mojsin <sup>4</sup>, Milena J. Stevanović <sup>4,7,8</sup>, Adriana Annušová <sup>9,10</sup>, Zdeno Špitalský <sup>2</sup> and Biljana M. Todorović Marković <sup>1,\*</sup>

<sup>1</sup> Vinča Institute of Nuclear Sciences—National Institute of the Republic of Serbia, University of Belgrade, 11000 Belgrade, Serbia

<sup>2</sup> Polymer Institute, Slovak Academy of Sciences, Dúbravská Cestá 9, 84541 Bratislava, Slovakia

<sup>3</sup> Department of Physical Electronics, Faculty of Science, Masaryk University, Kotlářská 2, 611 37 Brno, Czech Republic

<sup>4</sup> Institute of Molecular Genetics and Genetic Engineering, University of Belgrade, Vojvode Stepe 444a, 11042 Belgrade, Serbia

<sup>5</sup> Institute of Materials and Machine Mechanics, Slovak Academy of Sciences, Dúbravská cestá 9/6319, 84513 Bratislava, Slovakia

<sup>6</sup> J. Heyrovsky Institute of Physical Chemistry, Academy of Sciences of the Czech Republic, Dolejškova 3, 182 23 Praha, Czech Republic

<sup>7</sup> Faculty of Biology, University of Belgrade, Studentski trg 16, 11000 Belgrade, Serbia

<sup>8</sup> Serbian Academy of Sciences and Arts, Knez Mihailova 35, 11000 Belgrade, Serbia

<sup>9</sup> Department of Multilayers and Nanostructures, Institute of Physics, Slovak Academy of Sciences, Dúbravská Cestá 9, 84541 Bratislava, Slovakia

<sup>10</sup> Centre for Advanced Materials Application, Slovak Academy of Sciences, Dúbravská Cesta 9, 845 11 Bratislava, Slovakia

\* Correspondence: zoranmarkovic@vin.bg.ac.rs (Z.M.M.); biljatod@vin.bg.ac.rs (B.M.T.M.); Tel.: +381–113408582 (Z.M.M.)

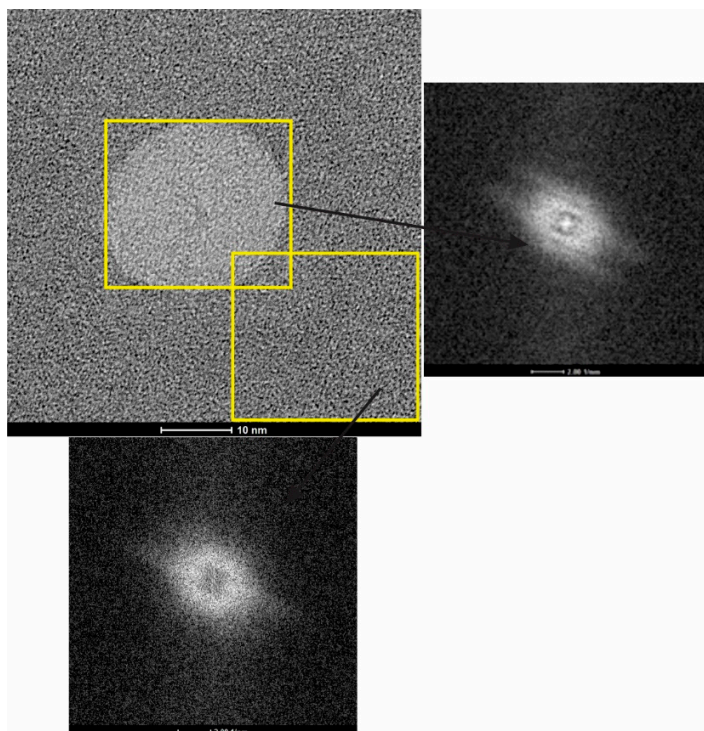

**Figure S1.** HRTEM micrograph and corresponding electron diffraction patterns of RF-CPDs and TEM supporting grid.

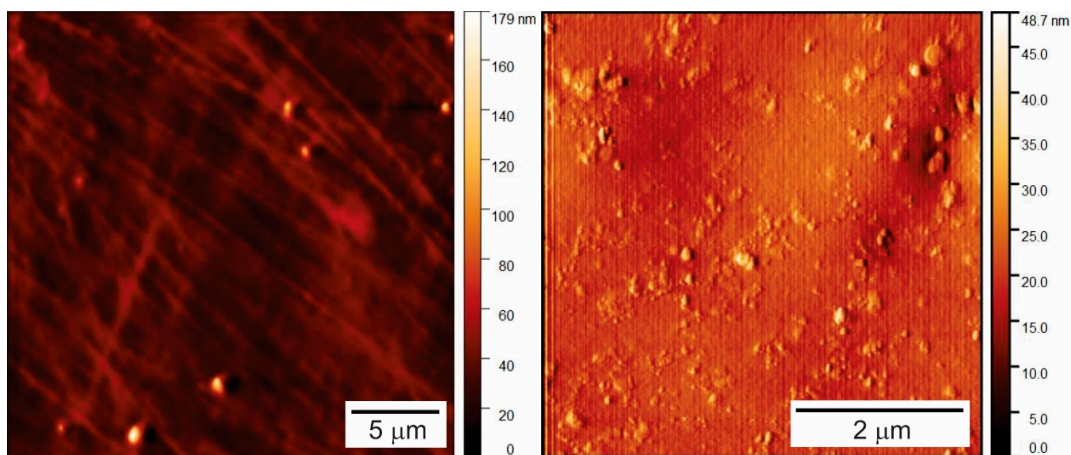

**Figure S2.** Top view AFM images of a) neat PU and b) RF-CPDs/PU composites.

**Table S1.** Characteristic bonds detected in the RF-CPDs samples.

| Characteristic bonds | Binding energy (eV) | At%   |
|----------------------|---------------------|-------|
| C 1s peak $sp^2$     | 284.42              | 31    |
| C 1s peak $sp^3$     | 285.40              | 48.7  |
| C 1s peak C=O        | 286.81              | 20.3  |
| O 1s peak C=O        | 531.68              | 100   |
| N 1s peak pyridinic  | 399.01              | 45.40 |
| N 1s peak pyrrolic   | 400.16              | 48.60 |
| N 1s peak C=N-C      | 396.72              | 6.00  |

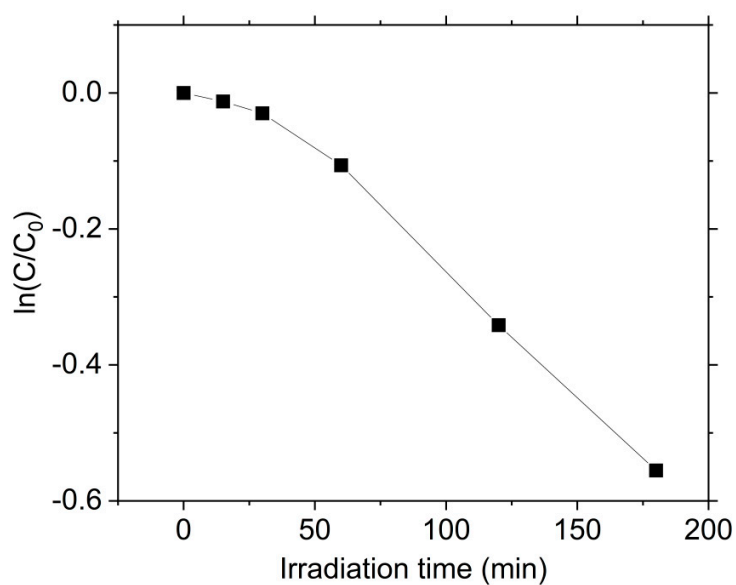

**Figure S3.** Kinetic rate of RB degradation rate in the presence of RF-CPDs/PU composite under blue light irradiation.

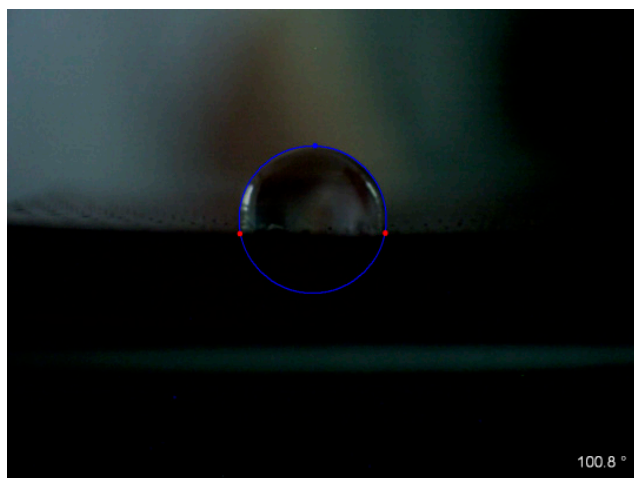

**Figure S4.** Contact angle measurement of water drop on RF-CPD/PU composites.
